# Supplementary material for: Leaf nitrogen from first principles: field evidence for adaptive variation with climate
Source: Copernicus journal article supplement (doi:10.5194/bg-14-481-2017), 2017-01-30
Supplement: Supplementary file 1 [file bg-14-481-2017-supplement.pdf]

Supplement of Biogeosciences, 14, 481–495, 2017  
<http://www.biogeosciences.net/14/481/2017/>  
doi:10.5194/bg-14-481-2017-supplement  
© Author(s) 2017. CC Attribution 3.0 License.

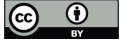

*Supplement of*

## **Leaf nitrogen from first principles: field evidence for adaptive variation with climate**

**Ning Dong et al.**

*Correspondence to:* Ning Dong ([ning.dong@students.mq.edu.au](mailto:ning.dong@students.mq.edu.au))

The copyright of individual parts of the supplement might differ from the CC-BY 3.0 licence.

Table S1. Species analyzed.  $c_i:c_a$ ;  $\ln N_{area}$  ( $\text{g m}^{-2}$ );  $\ln$  (mean canopy PAR,  $I_L$ ) ( $\mu\text{mol m}^{-2} \text{s}^{-1}$ ), the incident absorbed PAR (photosynthetically active radiation) during daylight hours;  $\ln$  LMA ( $\text{g m}^{-2}$ ); ‘N-fixer’;  $MI$ , moisture index;  $MAT$  ( $^{\circ}\text{C}$ ), annual mean temperature;  $MAP$ (mm), annual mean precipitation;  $I_0$  ( $\mu\text{mol m}^{-2} \text{s}^{-1}$ ) the incident PAR above the canopy during daylight hours;  $f_v$ (%):fractional cover of photosynthetic vegetation.

| Species                                | Family           | N-fixer | $c_i:c_a$ | $\ln N_{area}$ | $\ln I_L$ | $\ln$ LMA | MI    | MAT    | MAP      | $I_0$   | $f_v$ |
|----------------------------------------|------------------|---------|-----------|----------------|-----------|-----------|-------|--------|----------|---------|-------|
| Rhagodia eremaea                       | Rhagodidae       | no      | 0.759     | 1.504          | 6.104     | 4.642     | 0.157 | 22.575 | 339.973  | 986.849 | 18    |
| Ptilotus obovatus                      | Amaranthaceae    | no      | 0.662     | 1.515          | 6.104     | 4.747     | 0.157 | 22.575 | 339.973  | 986.849 | 18    |
| Solanum ellipticum                     | Solanaceae       | no      | 0.751     | 1.441          | 6.104     | 4.769     | 0.157 | 22.575 | 339.973  | 986.849 | 18    |
| Corymbia opaca                         | Myrtaceae        | no      | 0.664     | 1.155          | 6.104     | 5.602     | 0.157 | 22.575 | 339.973  | 986.849 | 18    |
| Acacia aptaneura                       | Fabaceae         | yes     | 0.688     | 2.038          | 6.104     | 6.061     | 0.157 | 22.575 | 339.973  | 986.849 | 18    |
| Aristida holathera                     | Poaceae          | no      | 0.517     | 0.669          | 6.104     | 4.788     | 0.157 | 22.575 | 339.973  | 986.849 | 18    |
| Eremophila longifolia                  | Myoporaceae      | no      | 0.676     | 1.498          | 6.104     | 5.182     | 0.157 | 22.575 | 339.973  | 986.849 | 18    |
| Sclerolaena cornishiana                | Amaranthaceae    | no      | 0.797     | 1.678          | 6.104     | 4.632     | 0.157 | 22.575 | 339.973  | 986.849 | 18    |
| Sida platycalyx                        | Malvaceae        | no      | 0.801     | 1.632          | 6.104     | 4.645     | 0.157 | 22.575 | 339.973  | 986.849 | 18    |
| Hakea divaricata                       | Proteaceae       | no      | 0.664     | 1.684          | 6.104     | 5.434     | 0.157 | 22.575 | 339.973  | 986.849 | 18    |
| Senna artemisioides ssp. artemisioides | Fabaceae         | yes     | 0.744     | 1.470          | 6.104     | 5.177     | 0.157 | 22.575 | 339.973  | 986.849 | 18    |
| Eremophila latrobei                    | Myoporaceae      | no      | 0.683     | 1.951          | 6.104     | 5.406     | 0.157 | 22.575 | 339.973  | 986.849 | 18    |
| Acacia aneura                          | Fabaceae         | yes     | 0.679     | 2.184          | 6.104     | 6.273     | 0.157 | 22.575 | 339.973  | 986.849 | 18    |
| Abutilon fraseri                       | Malvaceae        | no      | 0.678     | 1.251          | 6.104     | 4.678     | 0.157 | 22.575 | 339.973  | 986.849 | 18    |
| Rutidosia helichrysoides               | Asteraceae       | no      | 0.701     | 1.310          | 6.104     | 4.546     | 0.157 | 22.575 | 339.973  | 986.849 | 18    |
| Acacia aneura                          | Fabaceae         | yes     | 0.705     | 1.896          | 6.055     | 6.052     | 0.157 | 22.575 | 339.973  | 986.855 | 26    |
| Psyrax latifolia                       | Rubiaceae        | no      | 0.640     | 1.169          | 6.055     | 5.797     | 0.157 | 22.575 | 339.973  | 986.855 | 26    |
| Acacia kempeana                        | Fabaceae         | yes     | 0.665     | 1.964          | 6.055     | 5.888     | 0.157 | 22.575 | 339.973  | 986.855 | 26    |
| Corymbia opaca                         | Myrtaceae        | no      | 0.578     | 0.633          | 6.055     | 5.962     | 0.157 | 22.575 | 339.973  | 986.855 | 26    |
| Eremophila longifolia                  | Myoporaceae      | no      | 0.794     | 1.418          | 6.055     | 4.856     | 0.157 | 22.575 | 339.973  | 986.855 | 26    |
| Tinospora smilacina                    | Menispermaceae   | no      | 0.625     | 1.066          | 6.055     | 4.171     | 0.157 | 22.575 | 339.973  | 986.855 | 26    |
| Ptilotus obovatus                      | Amaranthaceae    | no      | 0.657     | 1.434          | 6.055     | 4.901     | 0.157 | 22.575 | 339.973  | 986.855 | 26    |
| Eremophila latrobei                    | Myoporaceae      | no      | 0.664     | 1.764          | 6.055     | 5.192     | 0.157 | 22.575 | 339.973  | 986.855 | 26    |
| Sida platycalyx                        | Malvaceae        | no      | 0.777     | 1.617          | 6.055     | 4.857     | 0.157 | 22.575 | 339.973  | 986.855 | 26    |
| Hakea divaricata                       | Proteaceae       | no      | 0.600     | 1.622          | 6.055     | 6.526     | 0.157 | 22.575 | 339.973  | 986.855 | 26    |
| Rhagodia eremaea                       | Rhagodidae       | no      | 0.689     | 2.632          | 6.055     | 6.095     | 0.157 | 22.575 | 339.973  | 986.855 | 26    |
| Goodenia heterochila                   | Goodeniaceae     | no      | 0.742     | 1.257          | 6.055     | 4.668     | 0.157 | 22.575 | 339.973  | 986.855 | 26    |
| Cucumis argenteus                      | Cucurbitaceae    | no      | 0.657     | 0.932          | 6.055     | 4.345     | 0.157 | 22.575 | 339.973  | 986.855 | 26    |
| Acacia aptaneura                       | Fabaceae         | yes     | 0.725     | 2.077          | 6.055     | 5.923     | 0.157 | 22.575 | 339.973  | 986.855 | 26    |
| Sclerolaena convexula                  | Amaranthaceae    | no      | 0.766     | 1.569          | 6.055     | 5.048     | 0.157 | 22.575 | 339.973  | 986.855 | 26    |
| Senna artemisioides ssp. artemisioides | Fabaceae         | yes     | 0.751     | 1.805          | 6.055     | 5.581     | 0.157 | 22.575 | 339.973  | 986.855 | 26    |
| Solanum quadriloculatum                | Solanaceae       | no      | 0.838     | 1.387          | 6.055     | 4.981     | 0.157 | 22.575 | 339.973  | 986.855 | 26    |
| Ehretia                                | Boraginaceae     | no      | 0.827     | 1.120          | 5.812     | 5.166     | 0.817 | 26.524 | 1726.128 | 910.999 | 48    |
| Acacia dimidiata                       | Fabaceae         | yes     | 0.849     | 0.787          | 5.812     | 5.122     | 0.817 | 26.524 | 1726.128 | 910.999 | 48    |
| Stenocarpus cunninghamii               | Proteaceae       | no      | 0.873     | 0.338          | 5.812     | 5.370     | 0.817 | 26.524 | 1726.128 | 910.999 | 48    |
| Perssonia falcata                      | Proteaceae       | no      | 0.927     | 0.814          | 5.812     | 5.360     | 0.817 | 26.524 | 1726.128 | 910.999 | 48    |
| Livistona humilis                      | Arecaceae        | no      | 0.802     | 0.607          | 5.812     | 4.998     | 0.817 | 26.524 | 1726.128 | 910.999 | 48    |
| Buchanania obovata                     | Anacardiaceae    | no      | 0.724     | 0.408          | 5.812     | 5.138     | 0.817 | 26.524 | 1726.128 | 910.999 | 48    |
| Alphitonia excelsa                     | Rhamnaceae       | no      | 0.799     | 0.441          | 5.812     | 5.152     | 0.817 | 26.524 | 1726.128 | 910.999 | 48    |
| Grevillea decurrens                    | Proteaceae       | no      | 0.788     | 0.001          | 5.812     | 4.901     | 0.817 | 26.524 | 1726.128 | 910.999 | 48    |
| Eucalyptus tetradonta                  | Myrtaceae        | no      | 0.814     | 0.650          | 5.812     | 5.436     | 0.817 | 26.524 | 1726.128 | 910.999 | 48    |
| Parinaria nonda                        | Chrysobalanaceae | no      | 0.872     | 0.623          | 5.812     | 4.819     | 0.817 | 26.524 | 1726.128 | 910.999 | 48    |
| Stenocarpus acacioides                 | Proteaceae       | no      | 0.807     | 0.567          | 5.812     | 5.080     | 0.817 | 26.524 | 1726.128 | 910.999 | 48    |
| Acacia oncinocarpa                     | Fabaceae         | yes     | 0.829     | 1.255          | 5.812     | 4.905     | 0.817 | 26.524 | 1726.128 | 910.999 | 48    |
| Denhamia obscura                       | Celastraceae     | no      | 0.850     | 0.405          | 5.812     | 4.873     | 0.817 | 26.524 | 1726.128 | 910.999 | 48    |
| Corymbia polysciada                    | Myrtaceae        | no      | 0.780     | 0.333          | 5.812     | 4.963     | 0.817 | 26.524 | 1726.128 | 910.999 | 48    |
| Eucalyptus miniata                     | Myrtaceae        | no      | 0.823     | 0.560          | 5.812     | 5.331     | 0.817 | 26.524 | 1726.128 | 910.999 | 48    |
| Grevillea decurrens                    | Proteaceae       | no      | 0.744     | 0.242          | 5.812     | 5.068     | 0.817 | 26.524 | 1726.128 | 910.999 | 48    |
| Petalostigma quadriloculare            | Picrodendraceae  | no      | 0.780     | -0.488         | 5.812     | 4.821     | 0.817 | 26.524 | 1726.128 | 910.999 | 48    |
| Pandanus spiralis                      | Pandanaceae      | no      | 0.804     | -0.298         | 5.812     | 5.463     | 0.817 | 26.524 | 1726.128 | 910.999 | 48    |
| Fabaceae sp.                           | Fabaceae         | yes     | 0.850     | 0.146          | 5.812     | 4.512     | 0.817 | 26.524 | 1726.128 | 910.999 | 48    |
| Dodonaea viscosa                       | Sapindaceae      | no      | 0.771     | 1.218          | 6.147     | 5.455     | 0.130 | 21.843 | 272.279  | 964.316 | 6     |
| Senna artemisioides ssp. alicia        | Fabaceae         | yes     | 0.742     | 1.188          | 6.147     | 5.716     | 0.130 | 21.843 | 272.279  | 964.316 | 6     |
| Amyema preissii                        | Loranthaceae     | no      | 0.837     | 1.508          | 6.147     | 6.341     | 0.130 | 21.843 | 272.279  | 964.316 | 6     |
| Sida cunninghamii                      | Malvaceae        | no      | 0.698     | 1.696          | 6.147     | 5.003     | 0.130 | 21.843 | 272.279  | 964.316 | 6     |
| Eremophila sturtii                     | Myoporaceae      | no      | 0.705     | 1.067          | 6.147     | 5.414     | 0.130 | 21.843 | 272.279  | 964.316 | 6     |
| Acacia aptaneura                       | Fabaceae         | yes     | 0.749     | 1.200          | 6.147     | 6.054     | 0.130 | 21.843 | 272.279  | 964.316 | 6     |
| Acacia victoriae                       | Fabaceae         | yes     | 0.648     | 1.367          | 6.147     | 5.163     | 0.130 | 21.843 | 272.279  | 964.316 | 6     |
| Atalaya hemiglauca                     | Sapindaceae      | no      | 0.643     | 0.946          | 6.147     | 4.955     | 0.130 | 21.843 | 272.279  | 964.316 | 6     |
| Acacia estrophiolata                   | Fabaceae         | yes     | 0.679     | 1.486          | 6.147     | 5.262     | 0.130 | 21.843 | 272.279  | 964.316 | 6     |
| Senna artemisioides ssp. filifolia     | Fabaceae         | yes     | 0.662     | 1.569          | 6.147     | 5.866     | 0.130 | 21.843 | 272.279  | 964.316 | 6     |
| Senna artemisioides ssp. petiolaris    | Fabaceae         | yes     | 0.684     | 1.393          | 6.147     | 5.793     | 0.130 | 21.843 | 272.279  | 964.316 | 6     |

|                                                      |                |     |       |       |       |       |       |        |         |         |    |
|------------------------------------------------------|----------------|-----|-------|-------|-------|-------|-------|--------|---------|---------|----|
| <i>Dipteracanthus australasicus</i>                  | Acanthaceae    | no  | 0.689 | 1.031 | 6.147 | 4.965 | 0.130 | 21.843 | 272.279 | 964.316 | 6  |
| <i>Scaevola amblyanthera</i>                         | Goodeniaceae   | no  | 0.739 | 1.153 | 6.147 | 4.964 | 0.130 | 21.843 | 272.279 | 964.316 | 6  |
| <i>Eremophila freelingii</i>                         | Myoporaceae    | no  | 0.800 | 0.680 | 6.147 | 5.226 | 0.130 | 21.843 | 272.279 | 964.316 | 6  |
| <i>Acacia murrayana</i>                              | Fabaceae       | yes | 0.658 | 1.571 | 6.147 | 5.333 | 0.130 | 21.843 | 272.279 | 964.316 | 6  |
| <i>Ptilotus obovatus</i>                             | Amaranthaceae  | no  | 0.708 | 1.098 | 6.132 | 4.869 | 0.117 | 21.744 | 244.947 | 964.420 | 9  |
| <i>Rhagodia eremaea</i>                              | Rhagodidae     | no  | 0.659 | 1.842 | 6.132 | 5.273 | 0.117 | 21.744 | 244.947 | 964.420 | 9  |
| <i>Senna artemisioides</i> ssp. <i>alicia</i>        | Fabaceae       | yes | 0.648 | 0.908 | 6.132 | 5.523 | 0.117 | 21.744 | 244.947 | 964.420 | 9  |
| <i>Senna artemisioides</i> ssp. <i>artemisioides</i> | Fabaceae       | yes | 0.699 | 1.307 | 6.132 | 5.504 | 0.117 | 21.744 | 244.947 | 964.420 | 9  |
| <i>Eremophila latrobei</i>                           | Myoporaceae    | no  | 0.680 | 1.422 | 6.132 | 5.607 | 0.117 | 21.744 | 244.947 | 964.420 | 9  |
| <i>Dodonaea viscosa</i>                              | Sapindaceae    | no  | 0.631 | 0.855 | 6.132 | 5.395 | 0.117 | 21.744 | 244.947 | 964.420 | 9  |
| <i>Amyema maidanii</i>                               | Loranthaceae   | no  | 0.729 | 1.736 | 6.132 | 5.743 | 0.117 | 21.744 | 244.947 | 964.420 | 9  |
| <i>Solanum quadriloculatum</i>                       | Solanaceae     | no  | 0.693 | 1.326 | 6.132 | 5.364 | 0.117 | 21.744 | 244.947 | 964.420 | 9  |
| <i>Enchylaena tomentosa</i>                          | Amaranthaceae  | no  | 0.560 | 1.915 | 6.132 | 5.399 | 0.117 | 21.744 | 244.947 | 964.420 | 9  |
| <i>Scaevola spinescens</i>                           | Goodeniaceae   | no  | 0.654 | 0.911 | 6.132 | 5.336 | 0.117 | 21.744 | 244.947 | 964.420 | 9  |
| <i>Senna artemisioides</i> ssp. <i>x coriacea</i>    | Fabaceae       | yes | 0.668 | 1.265 | 6.132 | 5.589 | 0.117 | 21.744 | 244.947 | 964.420 | 9  |
| <i>Eremophila freelingii</i>                         | Myoporaceae    | no  | 0.589 | 1.011 | 6.132 | 5.342 | 0.117 | 21.744 | 244.947 | 964.420 | 9  |
| <i>Acacia aneura</i>                                 | Fabaceae       | yes | 0.613 | 2.144 | 6.116 | 6.219 | 0.112 | 21.125 | 228.740 | 949.044 | 9  |
| <i>Maireana georgei</i>                              | Amaranthaceae  | no  | 0.502 | 2.054 | 6.116 | 5.728 | 0.112 | 21.125 | 228.740 | 949.044 | 9  |
| <i>Acacia tetanophylla</i>                           | Fabaceae       | yes | 0.581 | 1.668 | 6.116 | 5.947 | 0.112 | 21.125 | 228.740 | 949.044 | 9  |
| <i>Acacia aptaneura</i>                              | Fabaceae       | yes | 0.587 | 1.858 | 6.116 | 6.071 | 0.112 | 21.125 | 228.740 | 949.044 | 9  |
| <i>Senna artemisioides</i> ssp. <i>petiolaris</i>    | Fabaceae       | yes | 0.659 | 1.893 | 6.116 | 5.790 | 0.112 | 21.125 | 228.740 | 949.044 | 9  |
| <i>Senna artemisioides</i> ssp. <i>artemisioides</i> | Fabaceae       | yes | 0.662 | 1.326 | 6.116 | 5.810 | 0.112 | 21.125 | 228.740 | 949.044 | 9  |
| <i>Senna artemisioides</i> ssp. <i>x coriacea</i>    | Fabaceae       | yes | 0.574 | 1.342 | 6.116 | 5.628 | 0.112 | 21.125 | 228.740 | 949.044 | 9  |
| <i>Senna artemisioides</i> ssp. <i>alicia</i>        | Fabaceae       | yes | 0.588 | 1.217 | 6.116 | 5.468 | 0.112 | 21.125 | 228.740 | 949.044 | 9  |
| <i>Acacia sibirica</i>                               | Fabaceae       | yes | 0.592 | 1.840 | 6.116 | 6.038 | 0.112 | 21.125 | 228.740 | 949.044 | 9  |
| <i>Solanum quadriloculatum</i>                       | Solanaceae     | no  | 0.588 | 1.289 | 6.116 | 5.282 | 0.112 | 21.125 | 228.740 | 949.044 | 9  |
| <i>Ptilotus obovatus</i>                             | Amaranthaceae  | no  | 0.726 | 1.407 | 6.116 | 4.893 | 0.112 | 21.125 | 228.740 | 949.044 | 9  |
| <i>Enchylaena tomentosa</i>                          | Amaranthaceae  | no  | 0.662 | 1.924 | 6.116 | 5.406 | 0.112 | 21.125 | 228.740 | 949.044 | 9  |
| <i>Maireana triptera</i>                             | Amaranthaceae  | no  | 0.495 | 1.958 | 6.116 | 5.624 | 0.112 | 21.125 | 228.740 | 949.044 | 9  |
| <i>Eremophila latrobei</i>                           | Myoporaceae    | no  | 0.652 | 1.902 | 6.116 | 5.951 | 0.112 | 21.125 | 228.740 | 949.044 | 9  |
| <i>Sclerolaena diacantha</i>                         | Amaranthaceae  | no  | 0.573 | 1.507 | 6.116 | 5.574 | 0.112 | 21.125 | 228.740 | 949.044 | 9  |
| <i>Eremophila freelingii</i>                         | Myoporaceae    | no  | 0.581 | 1.813 | 6.116 | 5.929 | 0.112 | 21.125 | 228.740 | 949.044 | 9  |
| <i>Senecio magnificus</i>                            | Asteraceae     | no  | 0.588 | 0.887 | 6.147 | 4.651 | 0.144 | 20.828 | 299.126 | 968.521 | 7  |
| <i>Senna artemisioides</i> ssp. <i>artemisioides</i> | Fabaceae       | yes | 0.731 | 1.238 | 6.147 | 5.697 | 0.144 | 20.828 | 299.126 | 968.521 | 7  |
| <i>Acacia kempeana</i>                               | Fabaceae       | yes | 0.701 | 2.139 | 6.147 | 5.941 | 0.144 | 20.828 | 299.126 | 968.521 | 7  |
| <i>Acacia estrophiolata</i>                          | Fabaceae       | yes | 0.548 | 1.845 | 6.147 | 5.421 | 0.144 | 20.828 | 299.126 | 968.521 | 7  |
| <i>Eremophila longifolia</i>                         | Myoporaceae    | no  | 0.675 | 1.384 | 6.147 | 5.513 | 0.144 | 20.828 | 299.126 | 968.521 | 7  |
| <i>Amyema maidanii</i>                               | Loranthaceae   | no  | 0.791 | 1.834 | 6.147 | 5.938 | 0.144 | 20.828 | 299.126 | 968.521 | 7  |
| <i>Acacia murrayana</i>                              | Fabaceae       | yes | 0.722 | 1.770 | 6.147 | 5.547 | 0.144 | 20.828 | 299.126 | 968.521 | 7  |
| <i>Acacia aneura</i>                                 | Fabaceae       | yes | 0.715 | 2.180 | 6.147 | 6.281 | 0.144 | 20.828 | 299.126 | 968.521 | 7  |
| <i>Senna artemisioides</i> ssp. <i>alicia</i>        | Fabaceae       | yes | 0.648 | 1.805 | 6.147 | 5.572 | 0.144 | 20.828 | 299.126 | 968.521 | 7  |
| <i>Eremophila latrobei</i>                           | Myoporaceae    | no  | 0.647 | 1.768 | 6.147 | 5.722 | 0.144 | 20.828 | 299.126 | 968.521 | 7  |
| <i>Acacia aptaneura</i>                              | Fabaceae       | yes | 0.649 | 2.036 | 6.147 | 6.143 | 0.144 | 20.828 | 299.126 | 968.521 | 7  |
| <i>Acacia tetragonophylla</i>                        | Fabaceae       | yes | 0.767 | 1.496 | 6.147 | 5.764 | 0.144 | 20.828 | 299.126 | 968.521 | 7  |
| <i>Senna artemisioides</i> ssp. <i>filifolia</i>     | Fabaceae       | yes | 0.661 | 1.673 | 6.147 | 5.814 | 0.144 | 20.828 | 299.126 | 968.521 | 7  |
| <i>Einadia nutans</i>                                | Amaranthaceae  | no  | 0.640 | 2.167 | 6.147 | 5.927 | 0.144 | 20.828 | 299.126 | 968.521 | 7  |
| <i>Senna artemisioides</i> ssp. <i>oligophylla</i>   | Fabaceae       | yes | 0.753 | 1.342 | 6.004 | 5.536 | 0.221 | 25.470 | 487.614 | 976.099 | 32 |
| <i>Marsdenia viridiflora</i>                         | Apocynaceae    | no  | 0.612 | 0.999 | 6.004 | 4.912 | 0.221 | 25.470 | 487.614 | 976.099 | 32 |
| <i>Solanum quadriloculatum</i>                       | Solanaceae     | no  | 0.694 | 1.496 | 6.004 | 5.089 | 0.221 | 25.470 | 487.614 | 976.099 | 32 |
| <i>Carissa lanceolata</i>                            | Apocynaceae    | no  | 0.721 | 0.686 | 6.004 | 5.083 | 0.221 | 25.470 | 487.614 | 976.099 | 32 |
| <i>Abutilon otocarpum</i>                            | Malvaceae      | no  | 0.651 | 1.159 | 6.004 | 4.784 | 0.221 | 25.470 | 487.614 | 976.099 | 32 |
| <i>Grevillea striata</i>                             | Proteaceae     | no  | 0.705 | 0.653 | 6.004 | 5.948 | 0.221 | 25.470 | 487.614 | 976.099 | 32 |
| <i>Hakea chordophylla</i>                            | Proteaceae     | no  | 0.665 | 1.352 | 6.004 | 6.693 | 0.221 | 25.470 | 487.614 | 976.099 | 32 |
| <i>Ventilago viminalis</i>                           | Rhamnaceae     | no  | 0.727 | 1.106 | 6.004 | 5.311 | 0.221 | 25.470 | 487.614 | 976.099 | 32 |
| <i>Maytenus cunninghamii</i>                         | Celastraceae   | no  | 0.662 | 0.603 | 6.004 | 4.984 | 0.221 | 25.470 | 487.614 | 976.099 | 32 |
| <i>Acacia thomsonii</i>                              | Fabaceae       | yes | 0.802 | 1.587 | 6.004 | 5.674 | 0.221 | 25.470 | 487.614 | 976.099 | 32 |
| <i>Cucumis argenteus</i>                             | Cucurbitaceae  | no  | 0.646 | 0.682 | 6.004 | 4.456 | 0.221 | 25.470 | 487.614 | 976.099 | 32 |
| <i>Terminalia aridicola</i>                          | Combretaceae   | no  | 0.657 | 0.579 | 6.004 | 4.775 | 0.221 | 25.470 | 487.614 | 976.099 | 32 |
| <i>Flueggea virosa</i>                               | Euphorbiaceae  | no  | 0.624 | 1.281 | 6.004 | 5.067 | 0.221 | 25.470 | 487.614 | 976.099 | 32 |
| <i>Atalaya hemiglauca</i>                            | Sapindaceae    | no  | 0.676 | 1.235 | 6.004 | 5.068 | 0.221 | 25.470 | 487.614 | 976.099 | 32 |
| <i>Eremophila longifolia</i>                         | Myoporaceae    | no  | 0.667 | 1.463 | 6.004 | 5.371 | 0.221 | 25.470 | 487.614 | 976.099 | 32 |
| <i>Eucalyptus pruinosa</i>                           | Myrtaceae      | no  | 0.778 | 0.847 | 6.004 | 5.416 | 0.221 | 25.470 | 487.614 | 976.099 | 32 |
| <i>Cullen balsamicum</i>                             | Fabaceae       | yes | 0.682 | 1.322 | 6.004 | 4.854 | 0.221 | 25.470 | 487.614 | 976.099 | 32 |
| <i>Tinospora smilacina</i>                           | Menispermaceae | no  | 0.695 | 0.179 | 6.004 | 4.117 | 0.221 | 25.470 | 487.614 | 976.099 | 32 |
| <i>Psyrax attenuata</i>                              | Rubiaceae      | no  | 0.699 | 0.862 | 6.004 | 5.402 | 0.221 | 25.470 | 487.614 | 976.099 | 32 |
| <i>Streptoglossa odora</i>                           | Asteraceae     | no  | 0.800 | 0.807 | 6.110 | 4.685 | 0.233 | 25.280 | 512.685 | 975.908 | 15 |
| <i>Atalaya hemiglauca</i>                            | Sapindaceae    | no  | 0.604 | 1.265 | 6.110 | 5.265 | 0.233 | 25.280 | 512.685 | 975.908 | 15 |

|                                       |                 |     |       |        |       |       |       |        |         |         |    |
|---------------------------------------|-----------------|-----|-------|--------|-------|-------|-------|--------|---------|---------|----|
| Flueggea virosa                       | Euphorbiaceae   | no  | 0.705 | 0.871  | 6.110 | 4.979 | 0.233 | 25.280 | 512.685 | 975.908 | 15 |
| Grevillea striata                     | Proteaceae      | no  | 0.598 | 0.954  | 6.110 | 6.111 | 0.233 | 25.280 | 512.685 | 975.908 | 15 |
| Senna artemisioides ssp. oligophylla  | Fabaceae        | yes | 0.691 | 1.193  | 6.110 | 5.644 | 0.233 | 25.280 | 512.685 | 975.908 | 15 |
| Waltheria indica                      | Malvaceae       | no  | 0.738 | 0.488  | 6.110 | 4.761 | 0.233 | 25.280 | 512.685 | 975.908 | 15 |
| Eucalyptus pruinosa                   | Myrtaceae       | no  | 0.734 | 1.097  | 6.110 | 5.629 | 0.233 | 25.280 | 512.685 | 975.908 | 15 |
| Neptunia monosperma                   | Fabaceae        | yes | 0.715 | 0.819  | 6.110 | 4.428 | 0.233 | 25.280 | 512.685 | 975.908 | 15 |
| Tephrosia leptoclada                  | Fabaceae        | yes | 0.632 | 1.166  | 6.055 | 5.416 | 0.296 | 25.700 | 647.059 | 962.791 | 22 |
| Pterocaulon serrulatum var. velutinum | Asteraceae      | no  | 0.844 | 0.118  | 6.055 | 4.314 | 0.296 | 25.700 | 647.059 | 962.791 | 22 |
| Abutilon otocarpum                    | Malvaceae       | no  | 0.748 | 1.087  | 6.055 | 4.855 | 0.296 | 25.700 | 647.059 | 962.791 | 22 |
| Sida sp. supplejack station           | Malvaceae       | no  | 0.785 | 0.724  | 6.055 | 4.741 | 0.296 | 25.700 | 647.059 | 962.791 | 22 |
| Streptoglossa odora                   | Asteraceae      | no  | 0.617 | 1.504  | 6.055 | 5.630 | 0.296 | 25.700 | 647.059 | 962.791 | 22 |
| Eucalyptus leucophloia                | Myrtaceae       | no  | 0.734 | -0.085 | 6.055 | 5.790 | 0.296 | 25.700 | 647.059 | 962.791 | 22 |
| Acacia thomsonii                      | Fabaceae        | yes | 0.768 | 1.183  | 6.055 | 5.467 | 0.296 | 25.700 | 647.059 | 962.791 | 22 |
| Diplatia grandibractea                | Loranthaceae    | no  | 0.837 | 1.020  | 6.055 | 6.430 | 0.296 | 25.700 | 647.059 | 962.791 | 22 |
| Acacia phlebocarpa                    | Fabaceae        | yes | 0.711 | 1.183  | 6.055 | 5.004 | 0.296 | 25.700 | 647.059 | 962.791 | 22 |
| Corymbia flavescens                   | Myrtaceae       | no  | 0.724 | 0.967  | 5.945 | 5.341 | 0.359 | 25.593 | 777.249 | 953.769 | 37 |
| Hypericum gramineum                   | Clusiaceae      | no  | 0.785 | 0.709  | 5.945 | 4.840 | 0.359 | 25.593 | 777.249 | 953.769 | 37 |
| Corchorus walcottii                   | Malvaceae       | no  | 0.772 | 0.672  | 5.945 | 4.807 | 0.359 | 25.593 | 777.249 | 953.769 | 37 |
| Acacia sp.                            | Fabaceae        | yes | 0.816 | 1.221  | 5.945 | 5.331 | 0.359 | 25.593 | 777.249 | 953.769 | 37 |
| Terminalia canescens                  | Combretaceae    | no  | 0.735 | 0.702  | 5.945 | 5.163 | 0.359 | 25.593 | 777.249 | 953.769 | 37 |
| Acacia holosericea                    | Fabaceae        | yes | 0.758 | 1.536  | 5.945 | 5.137 | 0.359 | 25.593 | 777.249 | 953.769 | 37 |
| Melaleuca viridiflora                 | Myrtaceae       | no  | 0.854 | 1.194  | 5.945 | 5.792 | 0.359 | 25.593 | 777.249 | 953.769 | 37 |
| Grevillea parallela                   | Proteaceae      | no  | 0.670 | 0.963  | 5.945 | 5.771 | 0.359 | 25.593 | 777.249 | 953.769 | 37 |
| Cucumis melo                          | Cucurbitaceae   | no  | 0.746 | 0.393  | 5.945 | 4.696 | 0.359 | 25.593 | 777.249 | 953.769 | 37 |
| Petalostigma pubescens                | Picrodendraceae | no  | 0.758 | 0.623  | 5.945 | 5.265 | 0.359 | 25.593 | 777.249 | 953.769 | 37 |
| Bossiaea bossiaeoides                 | Fabaceae        | yes | 0.812 | 1.200  | 5.945 | 5.055 | 0.359 | 25.593 | 777.249 | 953.769 | 37 |
| Waltheria indica                      | Malvaceae       | no  | 0.772 | 0.385  | 5.945 | 4.698 | 0.359 | 25.593 | 777.249 | 953.769 | 37 |
| Acacia hemsleyi                       | Fabaceae        | yes | 0.759 | 1.194  | 5.945 | 5.091 | 0.359 | 25.593 | 777.249 | 953.769 | 37 |
| Grewia retusifolia                    | Malvaceae       | no  | 0.783 | 0.694  | 5.945 | 5.017 | 0.359 | 25.593 | 777.249 | 953.769 | 37 |
| Corymbia polycarpa                    | Myrtaceae       | no  | 0.802 | 0.467  | 5.945 | 5.539 | 0.359 | 25.593 | 777.249 | 953.769 | 37 |
| Capparis umbonata                     | Capparaceae     | no  | 0.823 | 1.373  | 5.974 | 5.484 | 0.429 | 27.385 | 948.038 | 947.806 | 32 |
| Hakea chordophylla                    | Proteaceae      | no  | 0.819 | 1.595  | 5.974 | 6.414 | 0.429 | 27.385 | 948.038 | 947.806 | 32 |
| Terminalia canescens                  | Combretaceae    | no  | 0.795 | 0.755  | 5.974 | 5.160 | 0.429 | 27.385 | 948.038 | 947.806 | 32 |
| Petalostigma banksii                  | Picrodendraceae | no  | 0.770 | 0.571  | 5.974 | 5.136 | 0.429 | 27.385 | 948.038 | 947.806 | 32 |
| Grevillea refracta                    | Proteaceae      | no  | 0.743 | 0.559  | 5.974 | 5.028 | 0.429 | 27.385 | 948.038 | 947.806 | 32 |
| Melaleuca symphyocarpa                | Myrtaceae       | no  | 0.810 | 0.641  | 5.974 | 5.132 | 0.429 | 27.385 | 948.038 | 947.806 | 32 |
| Tephrosia sp. Macarthur river         | Fabaceae        | yes | 0.701 | 1.156  | 5.974 | 5.135 | 0.429 | 27.385 | 948.038 | 947.806 | 32 |
| Acacia hemignosta                     | Fabaceae        | yes | 0.795 | 1.290  | 5.974 | 5.402 | 0.429 | 27.385 | 948.038 | 947.806 | 32 |
| Haemodorum brevicaula                 | Haemodoraceae   | no  | 0.678 | 1.033  | 5.974 | 5.663 | 0.429 | 27.385 | 948.038 | 947.806 | 32 |
| Calytrix exstipulata                  | Myrtaceae       | no  | 0.740 | 0.449  | 5.974 | 5.184 | 0.429 | 27.385 | 948.038 | 947.806 | 32 |
| Acacia hammondii                      | Fabaceae        | yes | 0.782 | 1.205  | 5.974 | 5.321 | 0.429 | 27.385 | 948.038 | 947.806 | 32 |
| Persoonia falcata                     | Proteaceae      | no  | 0.889 | 1.058  | 5.974 | 5.762 | 0.429 | 27.385 | 948.038 | 947.806 | 32 |
| Melaleuca viridiflora                 | Myrtaceae       | no  | 0.817 | 0.968  | 5.974 | 5.759 | 0.429 | 27.385 | 948.038 | 947.806 | 32 |
| Grevillea pteridifolia                | Proteaceae      | no  | 0.732 | 0.928  | 5.974 | 5.698 | 0.429 | 27.385 | 948.038 | 947.806 | 32 |
| Erythrophleum chlorostachys           | Fabaceae        | yes | 0.722 | 1.418  | 5.974 | 5.452 | 0.429 | 27.385 | 948.038 | 947.806 | 32 |
| Corymbia drysdalensis                 | Myrtaceae       | no  | 0.755 | 0.920  | 5.974 | 5.367 | 0.429 | 27.385 | 948.038 | 947.806 | 32 |
| Alphitonia excelsa                    | Rhamnaceae      | no  | 0.734 | 0.809  | 5.974 | 5.047 | 0.429 | 27.385 | 948.038 | 947.806 | 32 |
| Ehretia saligna                       | Boraginaceae    | no  | 0.779 | 0.659  | 5.974 | 4.847 | 0.429 | 27.385 | 948.038 | 947.806 | 32 |
| Haemodorum coccineum                  | Haemodoraceae   | no  | 0.733 | 0.579  | 5.974 | 5.724 | 0.429 | 27.385 | 948.038 | 947.806 | 32 |
| Marsdenia viridiflora                 | Apocynaceae     | no  | 0.851 | 2.353  | 5.953 | 6.638 | 0.397 | 27.633 | 888.099 | 961.042 | 37 |
| Atalaya hemiglauca                    | Sapindaceae     | no  | 0.814 | 0.831  | 5.953 | 5.059 | 0.397 | 27.633 | 888.099 | 961.042 | 37 |
| Eucalyptus tectifera                  | Myrtaceae       | no  | 0.844 | 0.657  | 5.953 | 5.014 | 0.397 | 27.633 | 888.099 | 961.042 | 37 |
| Atalaya variifolia                    | Sapindaceae     | no  | 0.775 | 0.923  | 5.953 | 4.947 | 0.397 | 27.633 | 888.099 | 961.042 | 37 |
| Brachychiton diversifolius            | Malvaceae       | no  | 0.714 | 0.298  | 5.953 | 4.599 | 0.397 | 27.633 | 888.099 | 961.042 | 37 |
| Alphitonia excelsa                    | Rhamnaceae      | no  | 0.647 | 1.227  | 5.953 | 5.180 | 0.397 | 27.633 | 888.099 | 961.042 | 37 |
| Terminalia canescens                  | Combretaceae    | no  | 0.804 | 0.706  | 5.953 | 5.186 | 0.397 | 27.633 | 888.099 | 961.042 | 37 |
| Melaleuca viridiflora                 | Myrtaceae       | no  | 0.738 | 0.664  | 5.953 | 5.597 | 0.397 | 27.633 | 888.099 | 961.042 | 37 |
| Terminalia platyptera                 | Combretaceae    | no  | 0.762 | 0.699  | 5.953 | 4.784 | 0.397 | 27.633 | 888.099 | 961.042 | 37 |
| Erythrophleum chlorostachys           | Fabaceae        | yes | 0.756 | 1.299  | 5.953 | 5.033 | 0.397 | 27.633 | 888.099 | 961.042 | 37 |
| Acacia dimidiata                      | Fabaceae        | yes | 0.788 | 1.319  | 5.953 | 5.021 | 0.397 | 27.633 | 888.099 | 961.042 | 37 |
| Corymbia polycarpa                    | Myrtaceae       | no  | 0.729 | 0.692  | 5.953 | 4.987 | 0.397 | 27.633 | 888.099 | 961.042 | 37 |
| Flueggea virosa                       | Euphorbiaceae   | no  | 0.723 | 0.731  | 5.953 | 4.999 | 0.397 | 27.633 | 888.099 | 961.042 | 37 |
| Petalostigma banksii                  | Picrodendraceae | no  | 0.754 | 0.547  | 5.953 | 5.211 | 0.397 | 27.633 | 888.099 | 961.042 | 37 |
| Grewia retusifolia                    | Malvaceae       | no  | 0.799 | 0.670  | 5.953 | 5.076 | 0.397 | 27.633 | 888.099 | 961.042 | 37 |
| Corymbia sp.                          | Myrtaceae       | no  | 0.688 | 1.041  | 5.953 | 5.214 | 0.397 | 27.633 | 888.099 | 961.042 | 37 |
| Hakea arborescens                     | Proteaceae      | no  | 0.846 | 0.932  | 5.953 | 5.955 | 0.397 | 27.633 | 888.099 | 961.042 | 37 |
| Sida cunninghamii                     | Malvaceae       | no  | 0.509 | 1.375  | 6.135 | 4.969 | 0.074 | 22.956 | 154.385 | 952.326 | 6  |

|                                                     |                  |     |       |       |       |       |       |        |         |         |    |
|-----------------------------------------------------|------------------|-----|-------|-------|-------|-------|-------|--------|---------|---------|----|
| <i>Eremophila macdonnellii</i> form white woolly    | Myoporaceae      | no  | 0.721 | 0.833 | 6.135 | 5.039 | 0.074 | 22.956 | 154.385 | 952.326 | 6  |
| <i>Eremophila macdonnellii</i> form small hairy     | Myoporaceae      | no  | 0.648 | 1.366 | 6.135 | 4.967 | 0.074 | 22.956 | 154.385 | 952.326 | 6  |
| <i>Salsola tragus</i>                               | Amaranthaceae    | no  | 0.597 | 0.874 | 6.135 | 5.063 | 0.074 | 22.956 | 154.385 | 952.326 | 6  |
| <i>Eremophila willsii</i>                           | Myoporaceae      | no  | 0.663 | 1.441 | 6.135 | 5.421 | 0.074 | 22.956 | 154.385 | 952.326 | 6  |
| <i>Crotalaria eremaea</i> ssp. <i>eremaea</i>       | Fabaceae         | yes | 0.555 | 2.035 | 6.135 | 4.871 | 0.074 | 22.956 | 154.385 | 952.326 | 6  |
| <i>Corynotheca micrantha</i> var. <i>divaricata</i> | Anthericaceae    | no  | 0.573 | 1.434 | 6.135 | 5.980 | 0.074 | 22.956 | 154.385 | 952.326 | 6  |
| <i>Brunonia australis</i>                           | Goodeniaceae     | no  | 0.639 | 1.044 | 6.135 | 5.137 | 0.074 | 22.956 | 154.385 | 952.326 | 6  |
| <i>Acacia murrayana</i>                             | Fabaceae         | yes | 0.684 | 2.012 | 6.135 | 5.379 | 0.074 | 22.956 | 154.385 | 952.326 | 6  |
| <i>Adriana tomentosa</i> var. <i>hookeri</i>        | Euphorbiaceae    | no  | 0.664 | 1.340 | 6.135 | 5.260 | 0.074 | 22.956 | 154.385 | 952.326 | 6  |
| <i>Ptilotus obovatus</i>                            | Amaranthaceae    | no  | 0.560 | 1.296 | 6.135 | 5.238 | 0.074 | 22.956 | 154.385 | 952.326 | 6  |
| <i>Scaevola depauperata</i>                         | Goodeniaceae     | no  | 0.796 | 1.133 | 6.135 | 5.816 | 0.074 | 22.956 | 154.385 | 952.326 | 6  |
| <i>Zygochloa paradoxa</i>                           | Poaceae          | no  | 0.461 | 0.726 | 6.135 | 4.489 | 0.074 | 22.956 | 154.385 | 952.326 | 6  |
| <i>Acacia victoriae</i>                             | Fabaceae         | yes | 0.628 | 1.562 | 6.165 | 5.395 | 0.081 | 22.830 | 170.113 | 961.432 | 2  |
| <i>Cullen pallidum</i>                              | Fabaceae         | yes | 0.566 | 1.776 | 6.165 | 5.428 | 0.081 | 22.830 | 170.113 | 961.432 | 2  |
| <i>Senna artemisioides</i> ssp. <i>filifolia</i>    | Fabaceae         | yes | 0.597 | 2.127 | 6.165 | 5.967 | 0.081 | 22.830 | 170.113 | 961.432 | 2  |
| <i>Scaevola depauperata</i>                         | Goodeniaceae     | no  | 0.770 | 1.468 | 6.165 | 6.418 | 0.081 | 22.830 | 170.113 | 961.432 | 2  |
| <i>Eremophila macdonnellii</i> form white woolly    | Myoporaceae      | no  | 0.582 | 1.108 | 6.165 | 5.282 | 0.081 | 22.830 | 170.113 | 961.432 | 2  |
| <i>Acacia sibirica</i>                              | Fabaceae         | yes | 0.597 | 2.312 | 6.165 | 6.088 | 0.081 | 22.830 | 170.113 | 961.432 | 2  |
| <i>Solanum ellipticum</i>                           | Solanaceae       | no  | 0.561 | 2.134 | 6.165 | 5.400 | 0.081 | 22.830 | 170.113 | 961.432 | 2  |
| <i>Atalaya hemiglauca</i>                           | Sapindaceae      | no  | 0.645 | 1.243 | 6.165 | 5.392 | 0.081 | 22.830 | 170.113 | 961.432 | 2  |
| <i>Abutilon otocarpum</i>                           | Malvaceae        | no  | 0.529 | 2.016 | 6.165 | 5.505 | 0.081 | 22.830 | 170.113 | 961.432 | 2  |
| <i>Scaevola parvibarbata</i>                        | Goodeniaceae     | no  | 0.564 | 1.031 | 6.165 | 5.186 | 0.081 | 22.830 | 170.113 | 961.432 | 2  |
| <i>Acacia murrayana</i>                             | Fabaceae         | yes | 0.735 | 0.718 | 6.165 | 5.396 | 0.081 | 22.830 | 170.113 | 961.432 | 2  |
| <i>Swainsona oroboides</i>                          | Fabaceae         | yes | 0.629 | 1.456 | 6.114 | 4.975 | 0.108 | 22.245 | 221.565 | 942.167 | 8  |
| <i>Acacia cambagei</i>                              | Fabaceae         | yes | 0.721 | 1.496 | 6.114 | 5.793 | 0.108 | 22.245 | 221.565 | 942.167 | 8  |
| <i>Streptoglossa cylindriceps</i>                   | Asteraceae       | no  | 0.725 | 0.645 | 6.114 | 4.480 | 0.108 | 22.245 | 221.565 | 942.167 | 8  |
| <i>Rutidosia helichrysoides</i>                     | Asteraceae       | no  | 0.810 | 0.148 | 6.114 | 4.822 | 0.108 | 22.245 | 221.565 | 942.167 | 8  |
| <i>Pterocaulon sphacelatum</i>                      | Asteraceae       | no  | 0.723 | 0.651 | 6.114 | 4.735 | 0.108 | 22.245 | 221.565 | 942.167 | 8  |
| <i>Abutilon fraseri</i>                             | Malvaceae        | no  | 0.631 | 1.103 | 6.114 | 4.628 | 0.108 | 22.245 | 221.565 | 942.167 | 8  |
| <i>Acacia aneura</i>                                | Fabaceae         | yes | 0.723 | 2.037 | 6.114 | 6.052 | 0.108 | 22.245 | 221.565 | 942.167 | 8  |
| <i>Acacia tetragonophylla</i>                       | Fabaceae         | yes | 0.640 | 1.492 | 6.114 | 5.685 | 0.108 | 22.245 | 221.565 | 942.167 | 8  |
| <i>Chenopodium auricomum</i>                        | Amaranthaceae    | no  | 0.746 | 1.127 | 6.084 | 4.906 | 0.091 | 22.567 | 187.842 | 945.501 | 14 |
| <i>Sida fibulifera</i>                              | Malvaceae        | no  | 0.727 | 0.725 | 6.084 | 4.682 | 0.091 | 22.567 | 187.842 | 945.501 | 14 |
| <i>Rutidosia helichrysoides</i>                     | Asteraceae       | no  | 0.664 | 0.899 | 6.084 | 5.117 | 0.091 | 22.567 | 187.842 | 945.501 | 14 |
| <i>Malvastrum americanum</i> var. <i>americanum</i> | Malvaceae        | no  | 0.740 | 0.942 | 6.084 | 4.944 | 0.091 | 22.567 | 187.842 | 945.501 | 14 |
| <i>Eucalyptus coolabah</i>                          | Myrtaceae        | no  | 0.697 | 1.422 | 6.084 | 5.768 | 0.091 | 22.567 | 187.842 | 945.501 | 14 |
| <i>Callitris gracilis</i>                           | Cupressaceae     | no  | 0.747 | 1.289 | 5.487 | 5.646 | 0.365 | 15.852 | 522.135 | 694.483 | 54 |
| <i>Eucalyptus fasciculosa</i>                       | Myrtaceae        | no  | 0.722 | 1.304 | 5.487 | 5.426 | 0.365 | 15.852 | 522.135 | 694.483 | 54 |
| <i>Babingtonia behrii</i>                           | Myrtaceae        | no  | 0.743 | 1.049 | 5.487 | 5.439 | 0.365 | 15.852 | 522.135 | 694.483 | 54 |
| <i>Calytrix tetragona</i>                           | Myrtaceae        | no  | 0.769 | 0.580 | 5.487 | 5.129 | 0.365 | 15.852 | 522.135 | 694.483 | 54 |
| <i>Astroloma conostephioides</i>                    | Ericaceae        | no  | 0.738 | 0.947 | 5.487 | 5.268 | 0.365 | 15.852 | 522.135 | 694.483 | 54 |
| <i>Acacia pycnantha</i>                             | Fabaceae         | yes | 0.757 | 1.935 | 5.487 | 5.584 | 0.365 | 15.852 | 522.135 | 694.483 | 54 |
| <i>Allocasuarina verticillata</i>                   | Casuarinaceae    | yes | 0.702 | 2.036 | 5.487 | 6.237 | 0.365 | 15.852 | 522.135 | 694.483 | 54 |
| <i>Lysiana exocarpi</i>                             | Loranthaceae     | no  | 0.724 | 0.858 | 5.487 | 3.906 | 0.365 | 15.852 | 522.135 | 694.483 | 54 |
| <i>Acacia paradoxa</i>                              | Fabaceae         | yes | 0.690 | 1.183 | 5.487 | 4.774 | 0.365 | 15.852 | 522.135 | 694.483 | 54 |
| <i>Xanthorrhoea semiplana</i>                       | Xanthorrhoeaceae | no  | 0.599 | 1.040 | 5.487 | 6.364 | 0.365 | 15.852 | 522.135 | 694.483 | 54 |
| <i>Opercularia scabrida</i>                         | Rubiaceae        | no  | 0.732 | 1.174 | 5.487 | 5.086 | 0.365 | 15.852 | 522.135 | 694.483 | 54 |
| <i>Dodonaea viscosa</i>                             | Sapindaceae      | no  | 0.713 | 0.850 | 5.487 | 5.191 | 0.365 | 15.852 | 522.135 | 694.483 | 54 |
| <i>Chrysanthemoides monilifera</i>                  | Asteraceae       | no  | 0.595 | 0.834 | 5.487 | 5.443 | 0.365 | 15.852 | 522.135 | 694.483 | 54 |
| <i>Amyema miquelii</i>                              | Loranthaceae     | no  | 0.694 | 2.210 | 5.487 | 6.160 | 0.365 | 15.852 | 522.135 | 694.483 | 54 |
| <i>Banksia marginata</i>                            | Proteaceae       | no  | 0.664 | 0.964 | 5.487 | 5.098 | 0.365 | 15.852 | 522.135 | 694.483 | 54 |
| <i>Casuarina pauper</i>                             | Casuarinaceae    | yes | 0.635 | 1.856 | 5.860 | 6.364 | 0.183 | 16.318 | 315.135 | 845.288 | 32 |
| <i>Cassinia laevis</i>                              | Asteraceae       | no  | 0.804 | 0.937 | 5.860 | 5.399 | 0.183 | 16.318 | 315.135 | 845.288 | 32 |
| <i>Eucalyptus flindersii</i>                        | Myrtaceae        | no  | 0.558 | 1.481 | 5.860 | 5.767 | 0.183 | 16.318 | 315.135 | 845.288 | 32 |
| <i>Callitris glaucophylla</i>                       | Cupressaceae     | no  | 0.624 | 1.251 | 5.860 | 5.745 | 0.183 | 16.318 | 315.135 | 845.288 | 32 |
| <i>Grevillea aspera</i>                             | Proteaceae       | no  | 0.650 | 0.998 | 5.860 | 5.618 | 0.183 | 16.318 | 315.135 | 845.288 | 32 |
| <i>Pimelea glauca</i>                               | Thymelaeaceae    | no  | 0.641 | 1.384 | 5.860 | 5.317 | 0.183 | 16.318 | 315.135 | 845.288 | 32 |
| <i>Goodenia vernicosa</i>                           | Goodeniaceae     | no  | 0.668 | 1.116 | 5.860 | 5.634 | 0.183 | 16.318 | 315.135 | 845.288 | 32 |
| <i>Xanthorrhoea quadrangulata</i>                   | Xanthorrhoeaceae | no  | 0.610 | 1.507 | 5.860 | 6.044 | 0.183 | 16.318 | 315.135 | 845.288 | 32 |
| <i>Beyeria lechenaultii</i>                         | Euphorbiaceae    | no  | 0.547 | 1.605 | 5.860 | 5.816 | 0.183 | 16.318 | 315.135 | 845.288 | 32 |
| <i>Lomandra multiflora</i> ssp. <i>dura</i>         | Asparagaceae     | no  | 0.567 | 1.671 | 5.860 | 6.078 | 0.183 | 16.318 | 315.135 | 845.288 | 32 |
| <i>Calytrix tetragona</i>                           | Myrtaceae        | no  | 0.709 | 0.666 | 5.860 | 5.103 | 0.183 | 16.318 | 315.135 | 845.288 | 32 |
| <i>Ptilotus obovatus</i>                            | Amaranthaceae    | no  | 0.691 | 0.873 | 5.860 | 4.911 | 0.183 | 16.318 | 315.135 | 845.288 | 32 |
| <i>Templetonia aculeata</i>                         | Fabaceae         | yes | 0.600 | 2.453 | 5.860 | 6.454 | 0.183 | 16.318 | 315.135 | 845.288 | 32 |
| <i>Ozothamnus retusus</i>                           | Asteraceae       | no  | 0.760 | 0.997 | 5.860 | 5.282 | 0.183 | 16.318 | 315.135 | 845.288 | 32 |
| <i>Eremophila deserti</i>                           | Myoporaceae      | no  | 0.661 | 1.259 | 5.860 | 5.487 | 0.183 | 16.318 | 315.135 | 845.288 | 32 |
| <i>Amyema miquelii</i>                              | Loranthaceae     | no  | 0.684 | 1.883 | 5.860 | 6.042 | 0.183 | 16.318 | 315.135 | 845.288 | 32 |

|                                |                   |     |       |       |       |       |       |        |         |         |    |
|--------------------------------|-------------------|-----|-------|-------|-------|-------|-------|--------|---------|---------|----|
| Casuarina pauper               | Casuarinaceae     | yes | 0.680 | 2.248 | 5.746 | 6.404 | 0.276 | 14.914 | 443.548 | 793.260 | 39 |
| Acacia wattiana                | Fabaceae          | yes | 0.545 | 1.239 | 5.746 | 5.459 | 0.276 | 14.914 | 443.548 | 793.260 | 39 |
| Calytrix tetragona             | Myrtaceae         | no  | 0.560 | 0.976 | 5.746 | 5.146 | 0.276 | 14.914 | 443.548 | 793.260 | 39 |
| Astroloma humifusum            | Ericaceae         | no  | 0.776 | 0.464 | 5.746 | 4.904 | 0.276 | 14.914 | 443.548 | 793.260 | 39 |
| Gonocarpus elatus              | Haloragaceae      | no  | 0.751 | 1.092 | 5.746 | 5.184 | 0.276 | 14.914 | 443.548 | 793.260 | 39 |
| Cassinia laevis                | Asteraceae        | no  | 0.648 | 0.823 | 5.746 | 5.356 | 0.276 | 14.914 | 443.548 | 793.260 | 39 |
| Acacia contriva                | Fabaceae          | yes | 0.841 | 0.893 | 5.746 | 5.964 | 0.276 | 14.914 | 443.548 | 793.260 | 39 |
| Xanthorrhoea quadrangulata     | Xanthorrhoeaceae  | no  | 0.759 | 1.746 | 5.746 | 6.405 | 0.276 | 14.914 | 443.548 | 793.260 | 39 |
| Templetonia aculeata           | Fabaceae          | yes | 0.740 | 1.825 | 5.746 | 6.213 | 0.276 | 14.914 | 443.548 | 793.260 | 39 |
| Olearia decurrens              | Asteraceae        | no  | 0.670 | 1.278 | 5.746 | 5.454 | 0.276 | 14.914 | 443.548 | 793.260 | 39 |
| Lomandra multiflora ssp.dura   | Asparagaceae      | no  | 0.651 | 1.636 | 5.746 | 6.332 | 0.276 | 14.914 | 443.548 | 793.260 | 39 |
| Lysiana exocarpi               | Loranthaceae      | no  | 0.708 | 2.743 | 5.746 | 6.163 | 0.276 | 14.914 | 443.548 | 793.260 | 39 |
| Lomandra densiflora            | Asparagaceae      | no  | 0.675 | 1.598 | 5.746 | 6.030 | 0.276 | 14.914 | 443.548 | 793.260 | 39 |
| Dianella revoluta ssp.revoluta | Hemerocallidaceae | no  | 0.629 | 1.498 | 5.746 | 5.911 | 0.276 | 14.914 | 443.548 | 793.260 | 39 |
| Callitris glaucophylla         | Cupressaceae      | no  | 0.642 | 1.039 | 5.746 | 5.741 | 0.276 | 14.914 | 443.548 | 793.260 | 39 |
| Haloragis aspera               | Haloragaceae      | no  | 0.763 | 0.870 | 5.746 | 5.294 | 0.276 | 14.914 | 443.548 | 793.260 | 39 |
| Myoporum montanum              | Scrophulariaceae  | no  | 0.535 | 1.237 | 5.746 | 5.482 | 0.276 | 14.914 | 443.548 | 793.260 | 39 |
| Daviesia genistifolia          | Fabaceae          | yes | 0.576 | 1.672 | 5.688 | 5.761 | 0.258 | 17.114 | 412.994 | 772.117 | 43 |
| Acacia pycnantha               | Fabaceae          | yes | 0.634 | 2.023 | 5.688 | 5.599 | 0.258 | 17.114 | 412.994 | 772.117 | 43 |
| Allocasuarina verticillata     | Casuarinaceae     | yes | 0.703 | 2.003 | 5.688 | 6.244 | 0.258 | 17.114 | 412.994 | 772.117 | 43 |
| Acacia oswaldii                | Fabaceae          | yes | 0.622 | 2.053 | 5.688 | 6.067 | 0.258 | 17.114 | 412.994 | 772.117 | 43 |
| Eucalyptus odorata             | Myrtaceae         | no  | 0.637 | 1.560 | 5.688 | 5.794 | 0.258 | 17.114 | 412.994 | 772.117 | 43 |
| Acacia ligulata                | Fabaceae          | yes | 0.695 | 1.947 | 5.688 | 5.924 | 0.258 | 17.114 | 412.994 | 772.117 | 43 |
| Cassinia laevis                | Asteraceae        | no  | 0.730 | 0.827 | 5.688 | 5.299 | 0.258 | 17.114 | 412.994 | 772.117 | 43 |
| Pimelea microcephala           | Thymelaeaceae     | no  | 0.647 | 1.623 | 5.688 | 5.167 | 0.258 | 17.114 | 412.994 | 772.117 | 43 |
| Exocarpos aphyllus             | Santalaceae       | no  | 0.687 | 2.562 | 5.688 | 7.267 | 0.258 | 17.114 | 412.994 | 772.117 | 43 |
| Alectryon oleifolius           | Sapindaceae       | no  | 0.693 | 1.621 | 5.688 | 5.636 | 0.258 | 17.114 | 412.994 | 772.117 | 43 |
| Enchylaena tomentosa           | Amaranthaceae     | no  | 0.694 | 1.666 | 5.688 | 5.311 | 0.258 | 17.114 | 412.994 | 772.117 | 43 |
| Rhagodia paradoxa              | Rhagodiaceae      | no  | 0.764 | 1.461 | 5.688 | 5.322 | 0.258 | 17.114 | 412.994 | 772.117 | 43 |
| Eremophila glabra              | Myoporaceae       | no  | 0.678 | 1.293 | 5.688 | 5.534 | 0.258 | 17.114 | 412.994 | 772.117 | 43 |
| Lysiana exocarpi               | Loranthaceae      | no  | 0.738 | 0.967 | 5.688 | 5.797 | 0.258 | 17.114 | 412.994 | 772.117 | 43 |
| Pittosporum angustifolium      | Pittosporaceae    | no  | 0.581 | 1.200 | 5.688 | 5.676 | 0.258 | 17.114 | 412.994 | 772.117 | 43 |
| Acacia iteaphylla              | Fabaceae          | yes | 0.608 | 1.698 | 5.688 | 5.807 | 0.258 | 17.114 | 412.994 | 772.117 | 43 |
| Lomandra multiflora ssp.dura   | Asparagaceae      | no  | 0.630 | 1.053 | 5.445 | 6.495 | 0.478 | 16.173 | 672.080 | 678.843 | 56 |
| Lomandra densiflora            | Asparagaceae      | no  | 0.631 | 1.511 | 5.445 | 5.963 | 0.478 | 16.173 | 672.080 | 678.843 | 56 |
| Eucalyptus fasciculosa         | Myrtaceae         | no  | 0.715 | 1.154 | 5.445 | 5.739 | 0.478 | 16.173 | 672.080 | 678.843 | 56 |
| Glischrocaryon behrii          | Haloragaceae      | no  | 0.699 | 0.970 | 5.445 | 6.039 | 0.478 | 16.173 | 672.080 | 678.843 | 56 |
| Astroloma humifusum            | Ericaceae         | no  | 0.818 | 0.409 | 5.445 | 5.041 | 0.478 | 16.173 | 672.080 | 678.843 | 56 |
| Lomandra sororia               | Asparagaceae      | no  | 0.650 | 1.221 | 5.445 | 5.830 | 0.478 | 16.173 | 672.080 | 678.843 | 56 |
| Burchardia umbellata           | Colchicaceae      | no  | 0.759 | 1.015 | 5.445 | 5.058 | 0.478 | 16.173 | 672.080 | 678.843 | 56 |
| Calytrix tetragona             | Myrtaceae         | no  | 0.656 | 0.520 | 5.445 | 5.123 | 0.478 | 16.173 | 672.080 | 678.843 | 56 |
| Allocasuarina muelleriana      | Casuarinaceae     | yes | 0.701 | 1.323 | 5.445 | 5.816 | 0.478 | 16.173 | 672.080 | 678.843 | 56 |
| Astroloma conostephioides      | Ericaceae         | no  | 0.701 | 0.900 | 5.445 | 5.445 | 0.478 | 16.173 | 672.080 | 678.843 | 56 |
| Olearia ramulosa               | Asteraceae        | no  | 0.721 | 1.110 | 5.445 | 5.408 | 0.478 | 16.173 | 672.080 | 678.843 | 56 |
| Hibbertia crinita              | Dilleniaceae      | no  | 0.721 | 0.774 | 5.445 | 5.248 | 0.478 | 16.173 | 672.080 | 678.843 | 56 |
| Pimelea stricta                | Thymelaeaceae     | no  | 0.643 | 1.281 | 5.445 | 5.142 | 0.478 | 16.173 | 672.080 | 678.843 | 56 |
| Hakea rostrata                 | Proteaceae        | no  | 0.705 | 1.414 | 5.445 | 6.534 | 0.478 | 16.173 | 672.080 | 678.843 | 56 |
| Lepidosperma carphoides        | Cyperaceae        | no  | 0.699 | 1.028 | 5.445 | 5.754 | 0.478 | 16.173 | 672.080 | 678.843 | 56 |
| Amyema miquelii                | Loranthaceae      | no  | 0.795 | 1.421 | 5.445 | 6.219 | 0.478 | 16.173 | 672.080 | 678.843 | 56 |
| Xanthorrhoea quadrangulata     | Xanthorrhoeaceae  | no  | 0.727 | 1.272 | 5.445 | 6.048 | 0.478 | 16.173 | 672.080 | 678.843 | 56 |
| Acacia contriva                | Fabaceae          | yes | 0.668 | 1.402 | 5.445 | 5.854 | 0.478 | 16.173 | 672.080 | 678.843 | 56 |
| Lomandra micrantha             | Asparagaceae      | no  | 0.653 | 1.584 | 5.445 | 6.573 | 0.478 | 16.173 | 672.080 | 678.843 | 56 |
| Hardenbergia violacea          | Fabaceae          | yes | 0.593 | 1.095 | 5.445 | 5.014 | 0.478 | 16.173 | 672.080 | 678.843 | 56 |
| Lepidosperma viscidum          | Cyperaceae        | no  | 0.620 | 1.033 | 5.465 | 5.784 | 0.340 | 14.050 | 489.335 | 714.083 | 59 |
| Hakea carinata                 | Proteaceae        | no  | 0.717 | 0.975 | 5.465 | 5.843 | 0.340 | 14.050 | 489.335 | 714.083 | 59 |
| Hybanthus floribunda           | Violaceae         | no  | 0.607 | 1.634 | 5.465 | 5.132 | 0.340 | 14.050 | 489.335 | 714.083 | 59 |
| Pultenaea kraehenbuehlii       | Fabaceae          | yes | 0.717 | 1.186 | 5.465 | 4.813 | 0.340 | 14.050 | 489.335 | 714.083 | 59 |
| Opercularia turpis             | Rubiaceae         | no  | 0.651 | 0.919 | 5.465 | 5.302 | 0.340 | 14.050 | 489.335 | 714.083 | 59 |
| Dodonaea viscosa               | Sapindaceae       | no  | 0.604 | 1.341 | 5.465 | 5.081 | 0.340 | 14.050 | 489.335 | 714.083 | 59 |
| Lomandra multiflora ssp.dura   | Asparagaceae      | no  | 0.419 | 2.067 | 5.465 | 6.553 | 0.340 | 14.050 | 489.335 | 714.083 | 59 |
| Eucalyptus goniocalyx          | Myrtaceae         | no  | 0.755 | 1.123 | 5.465 | 5.588 | 0.340 | 14.050 | 489.335 | 714.083 | 59 |
| Dianella revoluta ssp.revoluta | Hemerocallidaceae | no  | 0.624 | 1.176 | 5.465 | 5.705 | 0.340 | 14.050 | 489.335 | 714.083 | 59 |
| Acacia myrtifolia              | Fabaceae          | yes | 0.731 | 1.620 | 5.465 | 5.883 | 0.340 | 14.050 | 489.335 | 714.083 | 59 |
| Bursaria spinosa               | Pittosporaceae    | no  | 0.675 | 0.451 | 5.465 | 4.637 | 0.340 | 14.050 | 489.335 | 714.083 | 59 |
| Acrotriche affinis             | Ericaceae         | no  | 0.781 | 0.439 | 5.465 | 4.968 | 0.340 | 14.050 | 489.335 | 714.083 | 59 |
| Exocarpos cupressiformis       | Santalaceae       | no  | 0.731 | 1.473 | 5.465 | 5.910 | 0.340 | 14.050 | 489.335 | 714.083 | 59 |
| Allocasuarina verticillata     | Casuarinaceae     | yes | 0.621 | 2.213 | 5.465 | 6.158 | 0.340 | 14.050 | 489.335 | 714.083 | 59 |

|                                     |                  |     |       |        |       |       |       |        |          |         |    |
|-------------------------------------|------------------|-----|-------|--------|-------|-------|-------|--------|----------|---------|----|
| <i>Calytrix tetragona</i>           | Myrtaceae        | no  | 0.585 | 0.619  | 5.465 | 5.056 | 0.340 | 14.050 | 489.335  | 714.083 | 59 |
| <i>Santalum acuminatum</i>          | Santalaceae      | no  | 0.778 | 1.599  | 5.465 | 5.934 | 0.340 | 14.050 | 489.335  | 714.083 | 59 |
| <i>Xanthorrhoea quadrangulata</i>   | Xanthorrhoeaceae | no  | 0.610 | 1.224  | 5.465 | 6.073 | 0.340 | 14.050 | 489.335  | 714.083 | 59 |
| <i>Eucalyptus odorata</i>           | Myrtaceae        | no  | 0.727 | 1.337  | 5.465 | 5.750 | 0.340 | 14.050 | 489.335  | 714.083 | 59 |
| <i>Olearia teretifolia</i>          | Asteraceae       | no  | 0.767 | 1.188  | 5.465 | 5.588 | 0.340 | 14.050 | 489.335  | 714.083 | 59 |
| <i>Austrostipa mollis</i>           | Poaceae          | no  | 0.686 | 0.451  | 5.465 | 4.863 | 0.340 | 14.050 | 489.335  | 714.083 | 59 |
| <i>Eucalyptus baxteri</i>           | Myrtaceae        | no  | 0.715 | 0.712  | 5.171 | 5.104 | 0.770 | 13.683 | 1024.668 | 672.423 | 77 |
| <i>Lomandra densiflora</i>          | Asparagaceae     | no  | 0.737 | 1.265  | 5.171 | 5.753 | 0.770 | 13.683 | 1024.668 | 672.423 | 77 |
| <i>Lomandra multiflora ssp.dura</i> | Asparagaceae     | no  | 0.585 | 1.224  | 5.171 | 6.789 | 0.770 | 13.683 | 1024.668 | 672.423 | 77 |
| <i>Eucalyptus obliqua</i>           | Myrtaceae        | no  | 0.809 | 0.502  | 5.171 | 5.415 | 0.770 | 13.683 | 1024.668 | 672.423 | 77 |
| <i>Allocasuarina verticillata</i>   | Casuarinaceae    | yes | 0.824 | 2.106  | 5.171 | 6.182 | 0.770 | 13.683 | 1024.668 | 672.423 | 77 |
| <i>Acacia myrtifolia</i>            | Fabaceae         | yes | 0.781 | 0.700  | 5.171 | 4.821 | 0.770 | 13.683 | 1024.668 | 672.423 | 77 |
| <i>Hakea carinata</i>               | Proteaceae       | no  | 0.798 | 0.583  | 5.171 | 5.706 | 0.770 | 13.683 | 1024.668 | 672.423 | 77 |
| <i>Hakea rostrata</i>               | Proteaceae       | no  | 0.742 | 0.927  | 5.171 | 6.099 | 0.770 | 13.683 | 1024.668 | 672.423 | 77 |
| <i>Olearia grandiflora</i>          | Asteraceae       | no  | 0.727 | 0.327  | 5.171 | 4.907 | 0.770 | 13.683 | 1024.668 | 672.423 | 77 |
| <i>Crataegus monogyna</i>           | Rosaceae         | no  | 0.781 | 0.625  | 5.171 | 4.358 | 0.770 | 13.683 | 1024.668 | 672.423 | 77 |
| <i>Pultenaea daphnoides</i>         | Fabaceae         | yes | 0.752 | 1.176  | 5.171 | 4.800 | 0.770 | 13.683 | 1024.668 | 672.423 | 77 |
| <i>Xanthorrhoea semiplana</i>       | Xanthorrhoeaceae | no  | 0.731 | 0.948  | 5.171 | 5.903 | 0.770 | 13.683 | 1024.668 | 672.423 | 77 |
| <i>Leptospermum myrsinoides</i>     | Myrtaceae        | no  | 0.749 | 0.431  | 5.171 | 4.878 | 0.770 | 13.683 | 1024.668 | 672.423 | 77 |
| <i>Lepidosperma semiteres</i>       | Cyperaceae       | no  | 0.741 | 0.604  | 5.171 | 5.802 | 0.770 | 13.683 | 1024.668 | 672.423 | 77 |
| <i>Senecio pterophorus</i>          | Asteraceae       | no  | 0.841 | 0.790  | 5.171 | 4.428 | 0.770 | 13.683 | 1024.668 | 672.423 | 77 |
| <i>Hibbertia crinita</i>            | Dilleniaceae     | no  | 0.735 | 1.012  | 5.171 | 5.169 | 0.770 | 13.683 | 1024.668 | 672.423 | 77 |
| <i>Rubus anglocandicans</i>         | Rosaceae         | no  | 0.629 | 0.785  | 5.171 | 4.436 | 0.770 | 13.683 | 1024.668 | 672.423 | 77 |
| <i>Watsonia sp.</i>                 | Iridaceae        | no  | 0.825 | -0.074 | 5.171 | 4.428 | 0.770 | 13.683 | 1024.668 | 672.423 | 77 |
| <i>Acacia pycnantha</i>             | Fabaceae         | yes | 0.813 | 1.758  | 5.171 | 5.453 | 0.770 | 13.683 | 1024.668 | 672.423 | 77 |
| <i>Cassytha pubescens</i>           | Lauraceae        | no  | 0.785 | 0.599  | 5.171 | 5.793 | 0.770 | 13.683 | 1024.668 | 672.423 | 77 |
| <i>Eucalyptus baxteri</i>           | Myrtaceae        | no  | 0.737 | 1.220  | 5.007 | 5.773 | 0.653 | 13.682 | 834.421  | 652.028 | 84 |
| <i>Xanthorrhoea semiplana</i>       | Xanthorrhoeaceae | no  | 0.807 | 1.233  | 5.007 | 5.904 | 0.653 | 13.682 | 834.421  | 652.028 | 84 |
| <i>Pultenaea involucrata</i>        | Fabaceae         | yes | 0.775 | 0.447  | 5.007 | 4.789 | 0.653 | 13.682 | 834.421  | 652.028 | 84 |
| <i>Banksia marginata</i>            | Proteaceae       | no  | 0.811 | 0.576  | 5.007 | 5.386 | 0.653 | 13.682 | 834.421  | 652.028 | 84 |
| <i>Casuarina stricta</i>            | Casuarinaceae    | yes | 0.806 | 1.521  | 5.007 | 5.952 | 0.653 | 13.682 | 834.421  | 652.028 | 84 |
| <i>Platylobium obtusangulum</i>     | Fabaceae         | yes | 0.748 | 1.019  | 5.007 | 4.982 | 0.653 | 13.682 | 834.421  | 652.028 | 84 |
| <i>Pultenaea daphnoides</i>         | Fabaceae         | yes | 0.701 | 0.942  | 5.007 | 4.932 | 0.653 | 13.682 | 834.421  | 652.028 | 84 |
| <i>Grevillea lavandulacea</i>       | Proteaceae       | no  | 0.792 | 0.990  | 5.007 | 5.361 | 0.653 | 13.682 | 834.421  | 652.028 | 84 |
| <i>Gahnia sieberiana</i>            | Cyperaceae       | no  | 0.734 | 0.265  | 5.007 | 5.446 | 0.653 | 13.682 | 834.421  | 652.028 | 84 |
| <i>Leptospermum myrsinoides</i>     | Myrtaceae        | no  | 0.738 | 0.620  | 5.007 | 5.124 | 0.653 | 13.682 | 834.421  | 652.028 | 84 |
| <i>Lepidosperma carphoides</i>      | Cyperaceae       | no  | 0.668 | 0.537  | 5.007 | 5.701 | 0.653 | 13.682 | 834.421  | 652.028 | 84 |
| <i>Leucopogon lanceolatus</i>       | Ericaceae        | no  | 0.813 | 0.383  | 5.007 | 4.712 | 0.653 | 13.682 | 834.421  | 652.028 | 84 |
| <i>Leptospermum continentale</i>    | Myrtaceae        | no  | 0.762 | 0.895  | 5.007 | 5.307 | 0.653 | 13.682 | 834.421  | 652.028 | 84 |
| <i>Acacia myrtifolia</i>            | Fabaceae         | yes | 0.684 | 0.779  | 5.007 | 5.049 | 0.653 | 13.682 | 834.421  | 652.028 | 84 |
| <i>Eucalyptus obliqua</i>           | Myrtaceae        | no  | 0.816 | 1.227  | 5.007 | 5.549 | 0.653 | 13.682 | 834.421  | 652.028 | 84 |
| <i>Glischrocaryon behrii</i>        | Haloragaceae     | no  | 0.822 | 0.838  | 5.007 | 5.761 | 0.653 | 13.682 | 834.421  | 652.028 | 84 |
| <i>Hakea rostrata</i>               | Proteaceae       | no  | 0.842 | 0.919  | 5.007 | 5.988 | 0.653 | 13.682 | 834.421  | 652.028 | 84 |
| <i>Isopogon ceratophyllus</i>       | Proteaceae       | no  | 0.804 | 0.029  | 5.007 | 5.844 | 0.653 | 13.682 | 834.421  | 652.028 | 84 |
| <i>Lepidosperma semiteres</i>       | Cyperaceae       | no  | 0.788 | 0.373  | 5.007 | 5.600 | 0.653 | 13.682 | 834.421  | 652.028 | 84 |
| <i>Astroloma humifusum</i>          | Ericaceae        | no  | 0.828 | 0.533  | 5.007 | 4.676 | 0.653 | 13.682 | 834.421  | 652.028 | 84 |
| <i>Leptospermum myrsinoides</i>     | Myrtaceae        | no  | 0.705 | 0.680  | 5.323 | 5.169 | 0.639 | 14.240 | 842.648  | 662.099 | 65 |
| <i>Hibbertia riparia</i>            | Dilleniaceae     | no  | 0.800 | 0.784  | 5.323 | 5.145 | 0.639 | 14.240 | 842.648  | 662.099 | 65 |
| <i>Pultenaea daphnoides</i>         | Fabaceae         | yes | 0.726 | 1.261  | 5.323 | 5.096 | 0.639 | 14.240 | 842.648  | 662.099 | 65 |
| <i>Burchardia umbellata</i>         | Colchicaceae     | no  | 0.687 | 1.116  | 5.323 | 4.899 | 0.639 | 14.240 | 842.648  | 662.099 | 65 |
| <i>Hibbertia exutiacies</i>         | Dilleniaceae     | no  | 0.887 | 0.556  | 5.323 | 4.962 | 0.639 | 14.240 | 842.648  | 662.099 | 65 |
| <i>Cassytha pubescens</i>           | Lauraceae        | no  | 0.647 | 1.062  | 5.323 | 5.997 | 0.639 | 14.240 | 842.648  | 662.099 | 65 |
| <i>Banksia marginata</i>            | Proteaceae       | no  | 0.722 | 0.808  | 5.323 | 5.230 | 0.639 | 14.240 | 842.648  | 662.099 | 65 |
| <i>Pteridium esculentum</i>         | Dennstaedtiaceae | no  | 0.724 | 0.418  | 5.323 | 5.357 | 0.639 | 14.240 | 842.648  | 662.099 | 65 |
| <i>Eucalyptus obliqua</i>           | Myrtaceae        | no  | 0.792 | 1.084  | 5.323 | 5.807 | 0.639 | 14.240 | 842.648  | 662.099 | 65 |
| <i>Acacia myrtifolia</i>            | Fabaceae         | yes | 0.837 | 1.077  | 5.323 | 5.216 | 0.639 | 14.240 | 842.648  | 662.099 | 65 |
| <i>Hakea rostrata</i>               | Proteaceae       | no  | 0.771 | 0.990  | 5.323 | 6.269 | 0.639 | 14.240 | 842.648  | 662.099 | 65 |
| <i>Eucalyptus cosmophylla</i>       | Myrtaceae        | no  | 0.778 | 1.343  | 5.323 | 5.745 | 0.639 | 14.240 | 842.648  | 662.099 | 65 |
| <i>Olearia ramulosa</i>             | Asteraceae       | no  | 0.936 | 1.438  | 5.323 | 5.270 | 0.639 | 14.240 | 842.648  | 662.099 | 65 |
| <i>Pultenaea involucrata</i>        | Fabaceae         | yes | 0.699 | 0.661  | 5.323 | 5.003 | 0.639 | 14.240 | 842.648  | 662.099 | 65 |
| <i>Allocasuarina muelleriana</i>    | Casuarinaceae    | yes | 0.801 | 1.464  | 5.323 | 5.797 | 0.639 | 14.240 | 842.648  | 662.099 | 65 |
| <i>Lepidosperma semiteres</i>       | Cyperaceae       | no  | 0.773 | 0.573  | 5.323 | 5.787 | 0.639 | 14.240 | 842.648  | 662.099 | 65 |
| <i>Xanthorrhoea semiplana</i>       | Xanthorrhoeaceae | no  | 0.634 | 1.018  | 5.323 | 6.033 | 0.639 | 14.240 | 842.648  | 662.099 | 65 |
| <i>Acacia cupularis</i>             | Fabaceae         | yes | 0.778 | 1.320  | 5.323 | 5.146 | 0.639 | 14.240 | 842.648  | 662.099 | 65 |
| <i>Isopogon ceratophyllus</i>       | Proteaceae       | no  | 0.842 | 0.086  | 5.323 | 5.575 | 0.639 | 14.240 | 842.648  | 662.099 | 65 |
| <i>Allocasuarina striata</i>        | Casuarinaceae    | yes | 0.834 | 1.718  | 5.323 | 6.094 | 0.639 | 14.240 | 842.648  | 662.099 | 65 |
| <i>Eremophila sturtii</i>           | Myoporaceae      | no  | 0.544 | 1.223  | 6.043 | 5.368 | 0.098 | 20.445 | 182.457  | 882.979 | 9  |

---

|                                     |               |     |       |       |       |       |       |        |         |         |   |
|-------------------------------------|---------------|-----|-------|-------|-------|-------|-------|--------|---------|---------|---|
| Casuarina pauper                    | Casuarinaceae | yes | 0.639 | 1.760 | 6.043 | 6.296 | 0.098 | 20.445 | 182.457 | 882.979 | 9 |
| Rhagodia spinescens                 | Amaranthaceae | no  | 0.570 | 1.573 | 6.043 | 5.116 | 0.098 | 20.445 | 182.457 | 882.979 | 9 |
| Sida fibulifera                     | Malvaceae     | no  | 0.631 | 1.084 | 6.043 | 4.657 | 0.098 | 20.445 | 182.457 | 882.979 | 9 |
| Acacia ligulata                     | Fabaceae      | yes | 0.646 | 2.095 | 6.043 | 5.951 | 0.098 | 20.445 | 182.457 | 882.979 | 9 |
| Santalum lanceolatum                | Santalaceae   | no  | 0.691 | 1.283 | 6.043 | 5.347 | 0.098 | 20.445 | 182.457 | 882.979 | 9 |
| Dodonaea viscosa                    | Sapindaceae   | no  | 0.495 | 1.256 | 6.043 | 5.474 | 0.098 | 20.445 | 182.457 | 882.979 | 9 |
| Senna artemisioides ssp. x coriacea | Fabaceae      | yes | 0.556 | 1.373 | 6.043 | 5.441 | 0.098 | 20.445 | 182.457 | 882.979 | 9 |
| Lysiana exocarpi                    | Loranthaceae  | no  | 0.625 | 2.251 | 6.043 | 5.979 | 0.098 | 20.445 | 182.457 | 882.979 | 9 |

---
